# Supplementary material for: Immune cell infiltration as a biomarker for the diagnosis and prognosis of stage I–III colon cancer
Source: Springer Nature journal article supplement (doi:10.1007/s00262-018-2289-7), 2018-12-18
Supplement: MOESM1 [file 16353256]

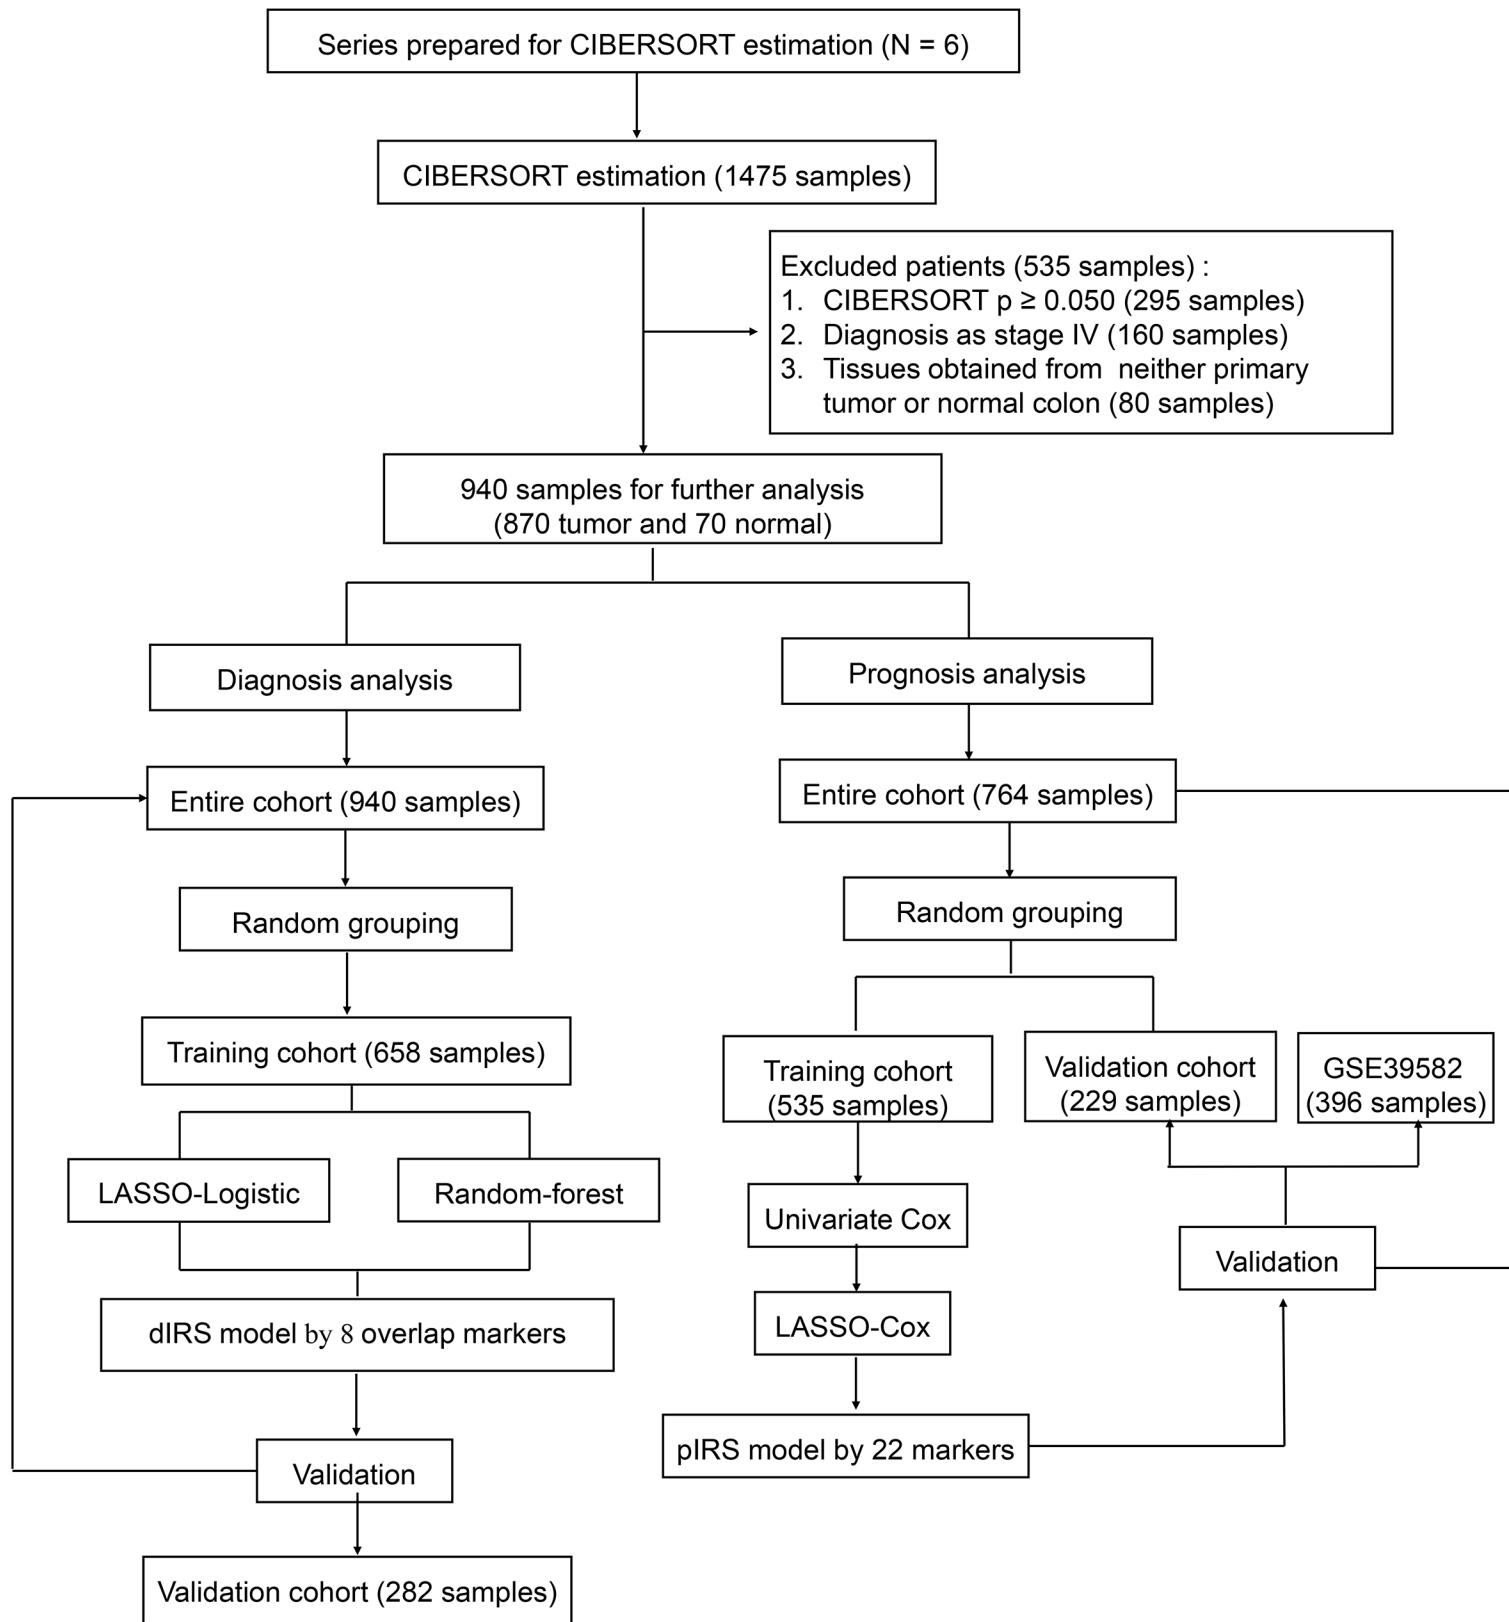

Supplemental Figure 1: Workflow chart of data collection and analysis

*CIBERSORT*, Cell type Identification By Estimating Relative Subsets Of RNA Transcripts; *LASSO*, least absolute shrinkage and selection operator; *dIRS*, diagnostic immune risk score; *pIRS*, prognostic immune risk score.

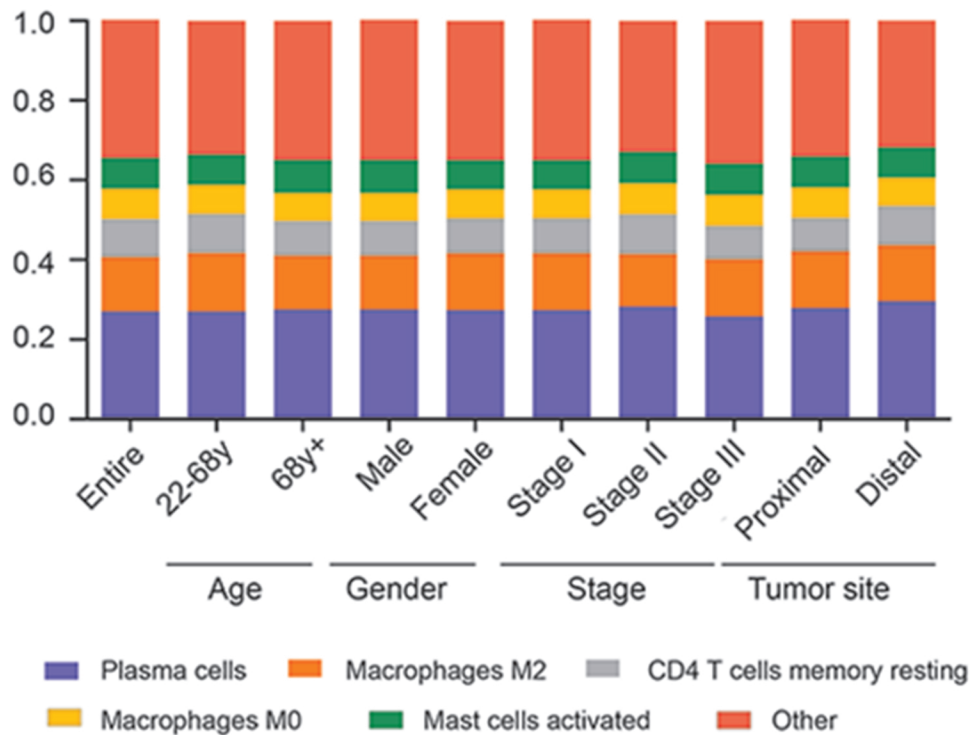

## Supplemental Figure 2: Summary of inferred immune cell subsets.

Bar charts summarizing immune cell subset proportions within and across clinical subgroups of colon cancer tissues in the entire cohort.

a

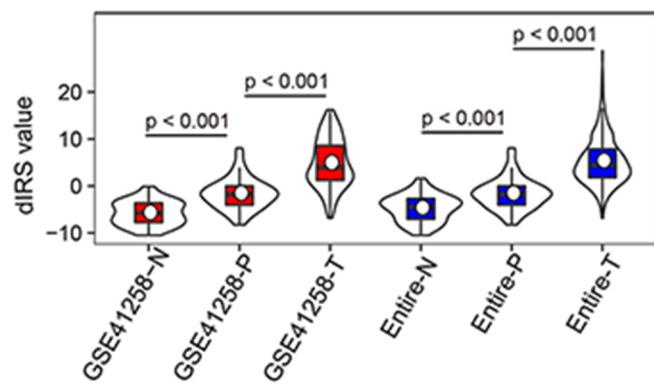

b

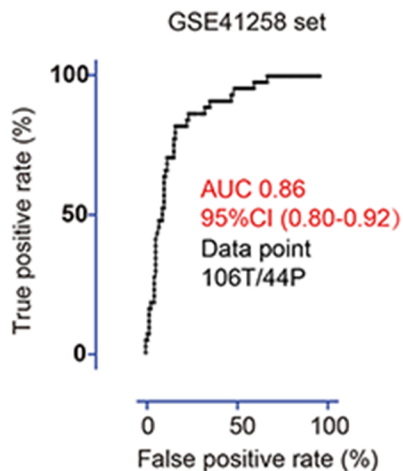

c

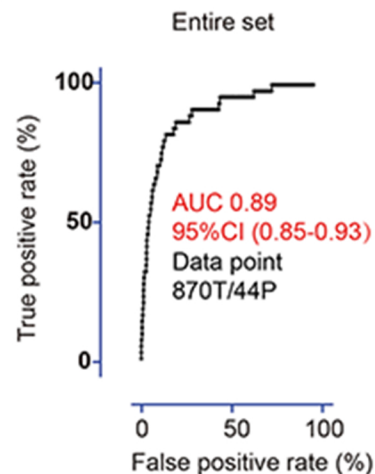

Supplemental Figure 3: dIRS values in colonic polyp and tumour samples.

(a) Distribution of dIRS values in colonic polyp and tumour tissues. The box plots inside the violin indicate the median values and interquartile ranges of dIRS. The white points represent mean dIRS values; (b,c) Receiving operator characteristic curve and AUC values of the dIRS model for differentiating polyp and tumour samples in the training (b) and validation sets (c). *dIRS*, diagnostic immune risk score; *N*, normal; *P*, polyp; *T*, tumour; *AUC*, area under curve; *CI*, confidence interval.

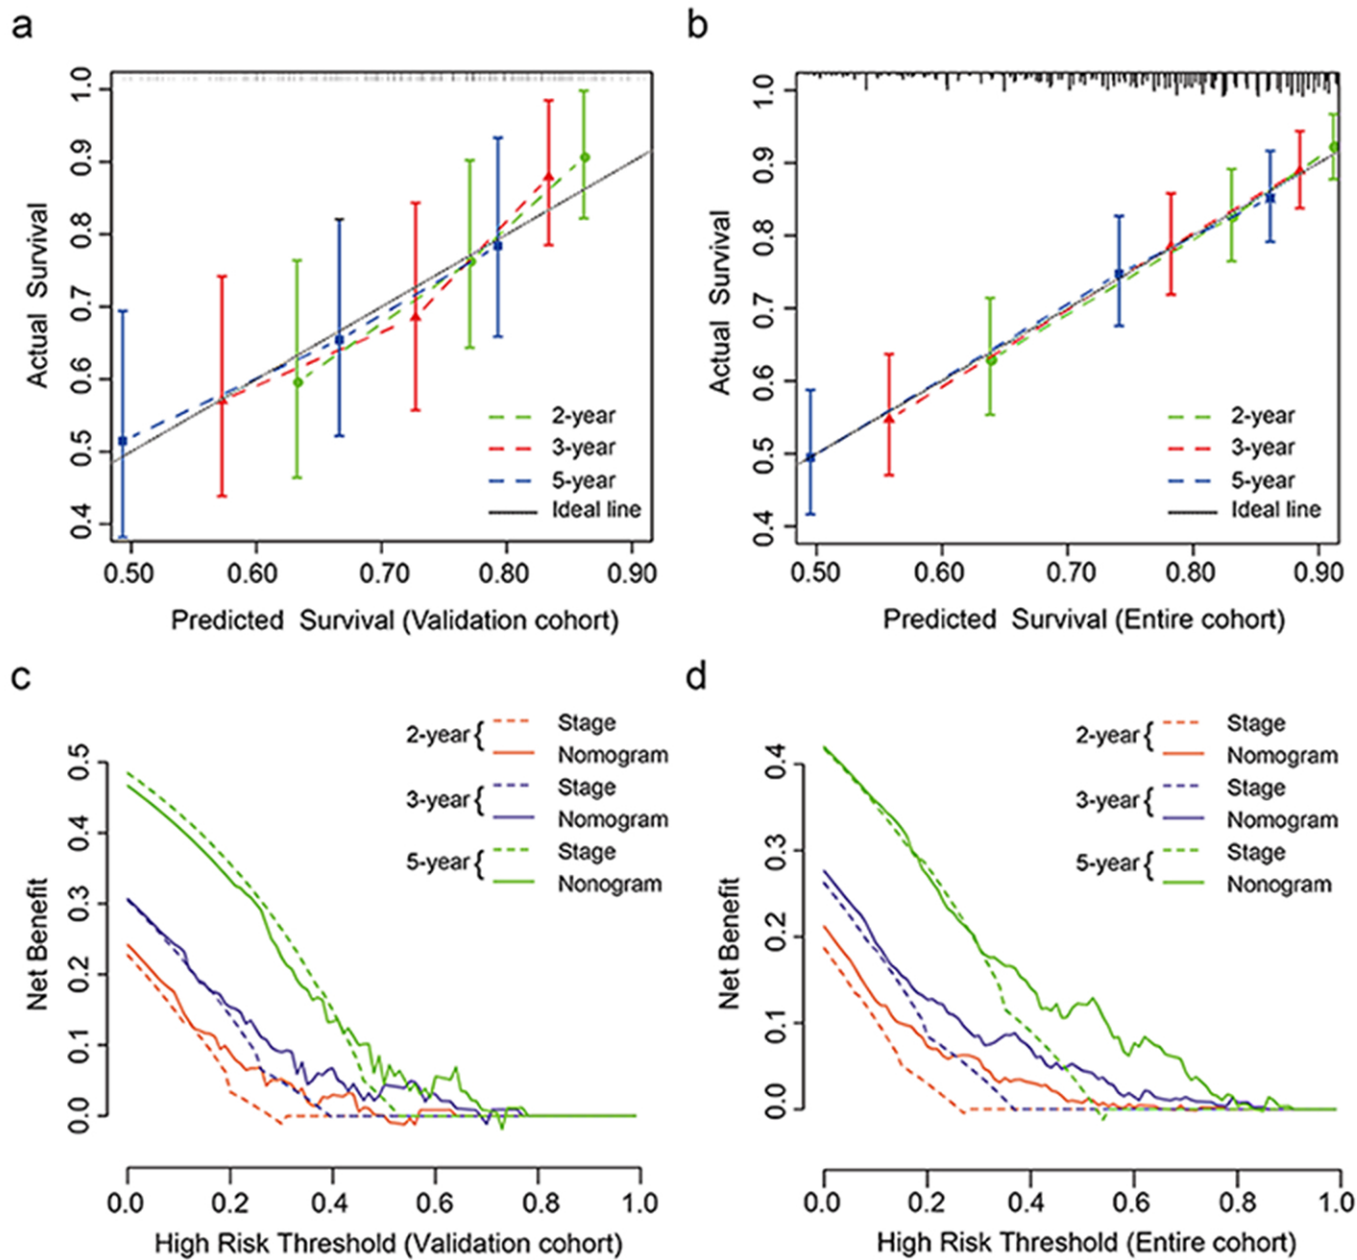

Supplemental Figure 4: Calibration curves and decision curves of the nomogram in the validation and entire cohorts.

(a,b) Plots depicting the calibration of the nomogram in terms of agreement between predicted and observed 2-year, 3-year, and 5-year outcomes in the validation(a) and entire(b) cohorts. The nomogram performance is shown by the plot, relative to the 45-degree line, which represents perfect prediction; (c,d) Decision curve analyses of the nomogram and TNM stage for 2-year, 3-year, and 5-year risk in the validation (c) and entire (d) cohorts.

**Supplemental Table 1. Patients' basic characteristics**

| <b>Item</b>        |          | <b>Number</b> | <b>Percent (%)</b> |
|--------------------|----------|---------------|--------------------|
| <b>Age</b>         | 22-68    | 406           | 46.7               |
|                    | > 68     | 391           | 44.9               |
|                    | Unknown  | 73            | 8.4                |
| <b>Gender</b>      | Male     | 420           | 48.3               |
|                    | Female   | 379           | 43.6               |
|                    | Unknown  | 71            | 8.7                |
| <b>Stage</b>       | I        | 90            | 10.3               |
|                    | II       | 449           | 51.6               |
|                    | III      | 331           | 38.0               |
| <b>Tumor site</b>  | Proximal | 251           | 28.9               |
|                    | Distal   | 333           | 38.3               |
|                    | Unknown  | 286           | 32.9               |
| <b>CMS subtype</b> | CMS1     | 129           | 14.8               |
|                    | CMS2     | 248           | 28.5               |
|                    | CMS3     | 81            | 9.3                |
|                    | CMS4     | 173           | 19.9               |
|                    | Unknown  | 239           | 27.5               |
| <b>Total</b>       |          | <b>870</b>    |                    |

Abbreviation: *CMS, consensus molecular subtypes*

**Supplemental Table 2. Comparison of demographics and clinical variables of the training and validation cohorts**

| Item                              | Diagnosis analysis           |                                |         | Prognosis analysis           |                                |         |
|-----------------------------------|------------------------------|--------------------------------|---------|------------------------------|--------------------------------|---------|
|                                   | Training cohort<br>(n = 609) | Validation cohort<br>(n = 261) | P value | Training cohort<br>(n = 535) | Validation cohort<br>(n = 229) | P value |
| <b>Age</b> (years; mean $\pm$ SD) | 66.90 $\pm$ 12.42            | 66.89 $\pm$ 13.08              | 0.99    | 66.97 $\pm$ 12.77            | 67.70 $\pm$ 12.93              | 0.50    |
| <b>Male</b> (n, %)                | 296 (53.1)                   | 123 (51.2)                     | 0.64    | 257 (48.0)                   | 109 (47.6)                     | 0.99    |
| <b>Stage</b>                      |                              |                                | 0.13    |                              |                                | 0.41    |
| I                                 | 58 (9.5)                     | 32 (12.5)                      |         | 49 (9.2)                     | 18 (7.9)                       |         |
| II                                | 328 (53.6)                   | 119 (46.5)                     |         | 278 (52.0)                   | 131 (57.2)                     |         |
| III                               | 226 (36.9)                   | 105 (41.0)                     |         | 208 (38.9)                   | 80 (34.9)                      |         |
| <b>Tumor site</b> (proximal, %)   | 178 (44.4)                   | 72 (39.8)                      | 0.32    | 180 (27.0)                   | 84 (29.5)                      | 0.42    |
| <b>CMS subtype</b>                |                              |                                | 0.68    |                              |                                | 0.92    |
| CMS1                              | 88 (19.7)                    | 41 (22.2)                      |         | 93 (17.4)                    | 36 (15.7)                      |         |
| CMS2                              | 178 (39.9)                   | 70 (37.8)                      |         | 166 (31.0)                   | 82 (35.8)                      |         |
| CMS3                              | 54 (12.1)                    | 27 (14.6)                      |         | 56 (10.5)                    | 25 (10.9)                      |         |
| CMS4                              | 126 (28.3)                   | 47 (25.4)                      |         | 126 (23.6)                   | 47 (20.5)                      |         |

Abbreviation: *CMS*, consensus molecular subtypes; *SD*, standard deviation.

**Supplemental Table 3. Coefficients of immune cell markers in colon cancer diagnosis**

| <b>Immune cell marker</b> | <b>Coefficients</b> | <b>SE</b> | <b>P value</b> |
|---------------------------|---------------------|-----------|----------------|
| Naïve B cells             | -28.83              | 6.00      | < 0.001        |
| T cells follicular helper | -29.97              | 8.54      | < 0.001        |
| Monocytes                 | 49.32               | 19.01     | 0.009          |
| Macrophage M0             | 41.50               | 11.06     | < 0.001        |
| Macrophage M1             | 41.28               | 11.68     | < 0.001        |
| Dendritic cells resting   | -25.89              | 9.72      | 0.008          |
| Mast cells resting        | -32.68              | 8.23      | 0.000          |
| Mast cells activated      | 8.12                | 7.13      | 0.225          |

Abbreviation: *SE*, standard errors

**Supplemental Table 4. Cut-off values for immune cell fractions**

| <b>Cell type</b>                          | <b>Cut-off value</b> |
|-------------------------------------------|----------------------|
| B cells naive                             | 0.0803               |
| B cells memory                            | 0.0835               |
| Plasma cells                              | 0.0587               |
| T cells CD8 <sup>+</sup>                  | 0.0615               |
| CD4 <sup>+</sup> T cells naive            | 0.0351               |
| CD4 <sup>+</sup> T cells memory resting   | 0.2426               |
| CD4 <sup>+</sup> T cells memory activated | 0.0246               |
| T cells follicular helper                 | 0.0832               |
| T cells regulatory                        | 0.0779               |
| $\gamma\delta$ T cells                    | 0.0758               |
| NK cells resting                          | 0.0911               |
| NK cells activated                        | 0.0342               |
| Monocytes                                 | 0.0012               |
| Macrophages M0                            | 0.0228               |
| Macrophages M1                            | 0.0314               |
| Macrophages M2                            | 0.2277               |
| Dendritic cells resting                   | 0.0436               |
| Dendritic cells activated                 | 0.0402               |
| Mast cells resting                        | 0.0767               |
| Mast cells activated                      | 0.1820               |
| Eosinophils                               | 0.0580               |
| Neutrophils                               | 0.0408               |



**Supplemental Table 5. Coefficients of immune cell markers in colon cancer prognosis**

| <b>Immune cell marker</b>                 | <b>Coefficients</b> | <b>SE</b> | <b>P value</b> | <b>HR</b> | <b>Lower CI</b> | <b>Upper CI</b> |
|-------------------------------------------|---------------------|-----------|----------------|-----------|-----------------|-----------------|
| B cells naive                             | -0.65               | 0.52      | 0.212          | 0.52      | 0.19            | 1.45            |
| B cells memory                            | 0.31                | 0.24      | 0.209          | 1.36      | 0.84            | 2.19            |
| Plasma cells                              | -0.69               | 0.32      | 0.029          | 0.50      | 0.27            | 0.93            |
| T cells CD8 <sup>+</sup>                  | 0.31                | 0.21      | 0.137          | 1.36      | 0.91            | 2.04            |
| CD4 <sup>+</sup> T cells naive            | -0.26               | 0.39      | 0.506          | 0.77      | 0.36            | 1.66            |
| CD4 <sup>+</sup> T cells memory resting   | 1.01                | 0.43      | 0.02           | 2.76      | 1.18            | 6.41            |
| CD4 <sup>+</sup> T cells memory activated | -0.15               | 0.22      | 0.509          | 0.86      | 0.56            | 1.34            |
| T cells follicular helper                 | -0.44               | 0.55      | 0.422          | 0.66      | 0.22            | 1.88            |
| T cells regulatory                        | 0.65                | 0.53      | 0.218          | 1.92      | 0.68            | 5.44            |
| $\gamma\delta$ T cells                    | 1.13                | 0.62      | 0.07           | 3.08      | 0.91            | 10.43           |
| NK cells resting                          | -0.83               | 0.61      | 0.178          | 0.44      | 0.13            | 1.45            |
| NK cells activated                        | 0.11                | 0.40      | 0.776          | 1.12      | 0.52            | 2.43            |
| Monocytes                                 | 0.48                | 0.21      | 0.019          | 1.62      | 1.08            | 2.43            |
| Macrophages M0                            | -0.14               | 0.21      | 0.49           | 0.86      | 0.57            | 1.31            |
| Macrophages M1                            | -0.48               | 0.19      | 0.013          | 0.62      | 0.42            | 0.90            |
| Macrophages M2                            | 0.70                | 0.27      | 0.01           | 2.00      | 1.18            | 3.40            |
| Dendritic cells resting                   | 0.14                | 0.28      | 0.618          | 1.15      | 0.66            | 2.01            |
| Dendritic cells activated                 | 0.60                | 0.39      | 0.131          | 1.80      | 0.84            | 3.87            |
| Mast cells resting                        | 1.23                | 0.45      | 0.007          | 3.41      | 1.40            | 8.28            |
| Mast cells activated                      | 0.21                | 0.41      | 0.605          | 1.24      | 0.55            | 2.76            |
| Eosinophils                               | 1.27                | 0.54      | 0.017          | 3.57      | 1.25            | 10.22           |
| Neutrophils                               | 0.66                | 0.25      | 0.008          | 1.94      | 1.19            | 3.16            |

Abbreviation: *SE*, standard errors, *HR*, hazard ratio; *CI*, confidence interval.

**Supplemental Table 6. Time-dependent receiver operator characteristic (ROC) analysis of pIRS**

| <b>Cohort</b>     | <b>Time point</b> | <b>AUC (95%CI)</b>  |
|-------------------|-------------------|---------------------|
| Training cohort   | 2-year            | 75.21 (69.76-80.65) |
|                   | 3-year            | 75.35 (70.08-80.62) |
|                   | 5-year            | 74.11 (68.31-79.91) |
| Validation cohort | 2-year            | 72.05 (63.81-80.28) |
|                   | 3-year            | 69.14 (60.86-77.42) |
|                   | 5-year            | 65.67 (56.39-74.95) |
| Entire cohort     | 2-year            | 74.03 (69.45-78.90) |
|                   | 3-year            | 73.48 (69.02-77.93) |
|                   | 5-year            | 71.61 (66.69-76.53) |

Abbreviation: ROC, receiver operating characteristic; pIRS, prognostic immune risk score; CI, confidence interval; AUC, area under curve.

**Supplemental Table 7. Univariate and multivariate survival analyses of pIRS and clinical variables in the GSE39582 series**

| Item                         | UVA                |         | MVA               |         |
|------------------------------|--------------------|---------|-------------------|---------|
|                              | HR (95% CI)        | P value | HR (95% CI)       | P value |
| Age <sup>a</sup>             | 1.01 (0.99-1.03)   | 0.223   | 1.01 (0.99-1.03)  | 0.112   |
| Gender (vs. Male)            | 0.62 (0.42-0.91)   | 0.016   | 0.56 (0.37-0.84)  | 0.005   |
| pIRS <sup>a</sup>            | 2.50 (1.96-3.19)   | < 0.001 | 2.43 (1.85-3.19)  | < 0.001 |
| Tumor site<br>(vs. proximal) | 1.04 (0.71-1.51)   | 0.853   | 1.21 (0.76-1.92)  | 0.418   |
| Stage (vs. stage I)          |                    |         |                   |         |
| Stage II                     | 8.10 (1.12-58.62)  | 0.038   | 6.09 (0.83-44.78) | 0.076   |
| Stage III                    | 12.18 (1.69-87.90) | 0.013   | 7.61 (1.02-56.68) | 0.048   |
| KRAS (vs. WT)                | 1.32 (0.91-1.92)   | 0.150   | 1.68 (1.07-2.63)  | 0.025   |
| BRAF (vs. WT)                | 0.99 (0.52-1.90)   | 0.975   | 1.75 (0.79-3.89)  | 0.167   |
| P53 (vs. WT)                 | 1.42 (0.84-2.41)   | 0.177   | 1.52 (0.86-2.67)  | 0.141   |
| MSI status<br>(vs. MSS)      | 0.55 (0.30-1.00)   | 0.050   | 0.77 (0.26-2.27)  | 0.634   |
| CIN (vs. positive)           | 1.38 (0.71-2.68)   | 0.336   | 0.84 (0.41-1.72)  | 0.633   |
| CMS subtype<br>(vs. CMS4)    |                    |         |                   |         |
| CMS1                         | 0.42 (0.23-0.78)   | 0.006   | 0.75 (0.28-2.00)  | 0.558   |
| CMS2                         | 0.61 (0.38-0.96)   | 0.035   | 0.76 (0.46-1.25)  | 0.277   |
| CMS3                         | 0.65 (0.34-1.23)   | 0.187   | 0.66 (0.33-1.31)  | 0.233   |

<sup>a</sup> Continuous variable

Abbreviation: *pIRS*, prognostic immune risk score; *UVA*, univariate analysis; *MVA*, multivariate analysis; *HR*, hazard ratio; *CI*, confidence interval; *WT*, wild type; *MSI*, microsatellite instability; *MSS*, microsatellite stability; *CIN*, chromosome instability; *CMS*, consensus molecular subtypes.

**Supplemental Table 8. Subgroup analyses of pIRS in the entire cohort**

| <b>Subgroup</b> | <b>HR (95%CI)</b>   | <b>P value</b> |
|-----------------|---------------------|----------------|
| GSE series      |                     |                |
| GSE17536        | 2.27 (1.50-3.44)    | < 0.001        |
| GSE33113        | 3.12 (1.85-5.28)    | < 0.001        |
| GSE37892        | 2.05 (1.27-3.33)    | 0.003          |
| GSE38832        | 6.41 (2.08-19.82)   | 0.001          |
| GSE39582        | 2.50 (1.96-3.19)    | < 0.001        |
| Age             |                     |                |
| 22-68 years     | 2.53 (2.01-3.19)    | < 0.001        |
| > 68 years      | 2.47 (1.89-3.22)    | < 0.001        |
| Gender          |                     |                |
| Male            | 2.43 (1.94-3.05)    | < 0.001        |
| Female          | 2.55 (1.94-3.35)    | < 0.001        |
| Tumor stage     |                     |                |
| Stage I         | 10.78 (1.15-101.20) | 0.038          |
| Stage II        | 2.59 (1.99-3.38)    | < 0.001        |
| Stage III       | 2.11 (1.68-2.66)    | < 0.001        |
| Tumor site      |                     |                |
| Proximal        | 2.30 (1.80-2.93)    | < 0.001        |
| Distal          | 2.77 (2.10-3.63)    | < 0.001        |
| CMS subgroup    |                     |                |
| CMS1            | 2.29 (1.48-3.53)    | < 0.001        |
| CMS2            | 2.13 (1.42-3.18)    | < 0.001        |
| CMS3            | 3.97 (1.89-8.35)    | < 0.001        |
| CMS4            | 2.34 (1.83-3.00)    | < 0.001        |

Abbreviation: *pIRS*, prognostic immune risk score; *HR*, hazard ratio; *CI*, confidence interval; *CMS*, consensus molecular subtypes.

## Supplemental Table 9. Cox regression coefficients and nomogram

### scores

| Cohort            |          | Coefficients | Score             |
|-------------------|----------|--------------|-------------------|
| Age <sup>a</sup>  |          | 0.001        | 0.10 * Age - 2.03 |
| Gender            | Male     |              | 8.17              |
|                   | Female   | -0.42        | 0                 |
| pIRS <sup>a</sup> |          | 0.79         | 22.22*pIRS-66.67  |
| Tumor site        | Proximal |              | 0                 |
|                   | Distal   | 0.12         | 6.14              |
| Stage             | I        |              | 0                 |
|                   | II       | 1.28         | 14.51             |
|                   | III      | 1.85         | 29.02             |
| CMS subtype       | CMS1     |              | 0                 |
|                   | CMS2     | -0.14        | 5.20              |
|                   | CMS3     | -0.28        | 10.41             |
|                   | CMS4     | 0.38         | 15.61             |

<sup>a</sup>Continuous variables

Abbreviation: *pIRS*, prognostic immune risk score; *CMS*, consensus molecular subtype.
